# Supplementary material
Source: Research Square preprint supplement (doi:10.21203/rs.3.rs-9465484/v1)
Supplement: Supplementary file 1 [file 72551ed4537bb6f40e8d9814.docx]

**Supporting Information**

**Environmental DNA reveals coral-driven shifts in reef fish networks: implications for conservation**

Cong Zeng1,#, Zheying Lin1,#, Zhiyi Su1, Yuanbin Zhao1, Yue Liu2, Mingjie Li2, Chengxuan Zou1, Qiang Lin3, Yue Zheng2, Hongqiang Yang3, Ling Cao2,*

1. State Key Laboratory of Submarine Geosciences and Maritime Delimitation, and School of Oceanography, Shanghai Jiao Tong University, Shanghai 200030, China

2. State Key Laboratory of Marine Environmental Science, College of Ocean and Earth Sciences, Xiamen University, Xiang’an South Road, Xiang’an District, Xiamen 361102, China

3. CAS Key Laboratory of Tropical Marine Bio-resources and Ecology, South China Sea Institute of Oceanology, Chinese Academy of Sciences, Guangzhou, 510301, China

# Equally contributed.

* Corresponding author, caoling@xmu.edu.cn

**Table S1.** Comparisons of α-diversity based on MOTU between different coral habitat conditions

|  | Species richness | Shannon index | Faith’s PD |
| --- | --- | --- | --- |
| Excellent | 315.84±95.47 | 2.49±0.70 | 61.33±52.54 |
| Moderate | 359.09±92.72 | 2.51±0.62 | 80.36±73.08 |
| Poor | 306.86±118.30 | 2.35±0.68 | 63.44±57.03 |

Table S2. Multiple comparisons across different coral health conditions and levels of human disturbance

| Comparison | Jaccard | | Bray-curtis | | Weighted-Unifrac | |
| --- | --- | --- | --- | --- | --- | --- |
| R2 | *p*.adj | R2 | *p*.adj | R2 | *p*.adj |
| Excellent vs Moderate | 0.020 | 0.001 | 0.023 | 0.001 | 0.020 | 0.146 |
| Excellent vs Poor | 0.011 | 0.001 | 0.013 | 0.001 | 0.010 | 0.321 |
| Moderate vs Poor | 0.011 | 0.001 | 0.013 | 0.001 | 0.014 | 0.068 |

Table S3. Topological metrics of fish community networks under different coral health conditions

|  | Excellent | Moderate | Poor |
| --- | --- | --- | --- |
| Number of edges | 71208 | 87463 | 106396 |
| Number of nodes | 2990 | 3436 | 5195 |
| Proportion of nonisolated vertices(%) | 14.05 | 13.53 | 24.23 |
| Average degree | 55.41 | 58.88 | 54.06 |
| Edge density | 0.02 | 0.02 | 0.01 |
| Average clustering coefficient | 0.02 | 0.02 | 0.01 |
| Edge connectivity | 31.46 | 34.15 | 29.88 |
| Average path length | 2.27 | 2.29 | 2.46 |
| Average centralization degree | 0.01 | 0.01 | 0.01 |
| Network Complexity | 0.52 | 0.71 | 0.29 |

Table S4. Mean relative abundance, annotated classification and features of module hubs identified through Zi-Pi analysis

| MOTU | Group | Mean relative abundance in group | Mean relative abundance rank percentile in group | Mean relative abundance rank percentile in poor group | Order | Genus | Species | Diet | Trophic Level |
| --- | --- | --- | --- | --- | --- | --- | --- | --- | --- |
| MOTU748 | Excellent | 0.00227 | 13.08 | 16.73 | Unassigned | Unassigned | *Unassigned* | / | / |
| MOTU2985 | Excellent | 0.00015 | 42.17 | / | Perciformes | Epinephelus | *Epinephelus hexagonatus* | carnivore | 4.05 |
| MOTU3325 | Excellent | 0.00015 | 42.88 | 81.14 | Scombriformes | Auxis | *unassigned* | carnivore | 4.36 |
| MOTU152 | Moderate | 0.15360 | 1.95 | 4.49 | Carcharhiniformes | Carcharhinus | *Carcharhinus plumbeus* | carnivore | 4.23 |
| MOTU179 | Moderate | 0.12235 | 2.39 | 9.01 | Centrarchiformes | Cirrhitichthys | *Cirrhitichthys falco* | carnivore | 3.96 |
| MOTU415 | Moderate | 0.01408 | 6.29 | 5.52 | Unassigned | Unassigned | *Unassigned* | / | / |
| MOTU509 | Moderate | 0.00619 | 8.21 | 17.05 | Unassigned | Unassigned | *Unassigned* | / | / |
| MOTU1660 | Moderate | 0.00211 | 12.31 | 34.48 | Centrarchiformes | Cirrhitichthys | *Cirrhitichthys falco* | carnivore | 3.96 |
| MOTU2535 | Moderate | 0.00067 | 19.94 | 79.58 | Acanthuriformes | Naso | *Naso brachycentron* | herbivore | 2.67 |
| MOTU2519 | Moderate | 0.00057 | 21.01 | / | Anguilliformes | Echidna | *Echidna nebulosa* | carnivore | 4.17 |
| MOTU5898 | Moderate | 0.00046 | 23.66 | 89.76 | Anguilliformes | Echidna | *Echidna nebulosa* | carnivore | 4.17 |
| MOTU2081 | Moderate | 0.00046 | 24.30 | / | Anguilliformes | Gymnothorax | *unassigned* | carnivore | 4.14 |
| MOTU13963 | Moderate | 0.00041 | 24.53 | / | Anguilliformes | Gymnothorax | *Gymnothorax javanicus* | carnivore | 3.87 |
| MOTU5919 | Moderate | 0.00041 | 25.52 | / | Eupercaria incertae sedis | Monotaxis | *Monotaxis grandoculis* | carnivore | 3.40 |
| MOTU3435 | Moderate | 0.00026 | 32.83 | / | unassigned | unassigned | *unassigned* | / | / |
| MOTU13946 | Moderate | 0.00021 | 34.58 | / | Perciformes | Cephalopholis | *Cephalopholis urodeta* | carnivore | 4.02 |
| MOTU2190 | Moderate | 0.00021 | 35.48 | 29.37 | Unassigned | Unassigned | *Unassigned* | / | / |
| MOTU2473 | Moderate | 0.00021 | 35.94 | 45.52 | Acanthuriformes | Acanthurus | *unassigned* | herbivore | 2.26 |
| MOTU5900 | Moderate | 0.00021 | 38.30 | / | Anguilliformes | unassigned | *unassigned* | / | / |
| MOTU5930 | Moderate | 0.00021 | 38.36 | / | Eupercaria incertae sedis | unassigned | *unassigned* | / | / |
| MOTU10385 | Moderate | 0.00015 | 39.52 | / | Unassigned | Unassigned | *Unassigned* | / | / |
| MOTU4542 | Moderate | 0.00015 | 46.25 | 49.43 | Eupercaria incertae sedis | Lutjanus | *Lutjanus kasmira* | carnivore | 3.84 |
| MOTU5899 | Moderate | 0.00015 | 47.44 | / | Anguilliformes | unassigned | *unassigned* | / | / |
| MOTU5907 | Moderate | 0.00015 | 47.47 | 41.33 | Eupercaria incertae sedis | Lutjanus | *unassigned* | carnivore | 3.91 |
| MOTU6900 | Moderate | 0.00015 | 48.08 | 93.03 | Eupercaria incertae sedis | Caesio | *unassigned* | carnivore | 3.40 |
| MOTU5912 | Moderate | 0.00010 | 63.10 | / | Anguilliformes | unassigned | *unassigned* | / | / |
